# Supplementary material for: An integrative synchronization and imaging approach for bistatic spaceborne/stratospheric SAR with a fixed receiver
Source: Springer Nature journal article supplement (doi:10.1186/1687-6180-2013-165), 2013-11-01

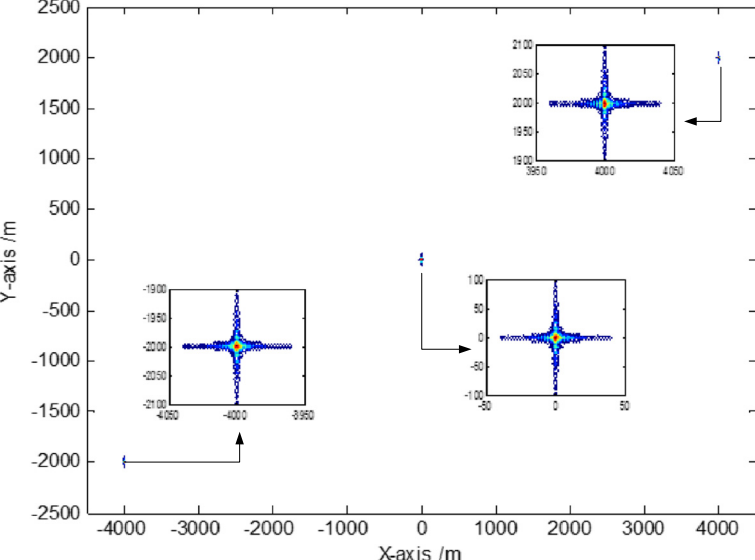

Supplement: 13634_2013_702_MOESM12_ESM.pdf [file 13634_2013_702_MOESM12_ESM.pdf]
